# Supplementary material for: Li-Rich Li-Si Alloy As A Lithium-Containing Negative Electrode Material Towards High Energy Lithium-Ion Batteries
Source: PubMed Central journal article supplement — Sci Rep. 2015 Jan 28;5:8085. doi: 10.1038/srep08085 (PMC4308695; doi:10.1038/srep08085), 2015-01-28
Supplement: srep08085-s1.pdf [file srep08085-s1.pdf]

# **Li-rich Li-Si alloy as a lithium-containing negative electrode material towards high energy lithium-ion batteries**

Shinichiroh Iwamura,<sup>†,‡</sup> Hirotomo Nishihara,<sup>†,\*</sup> Yoshitaka Ono,<sup>†</sup> Haruhiko Morito,<sup>†</sup> Hisanori Yamane,<sup>†</sup> Hiroki Nara,<sup>§</sup> Tetsuya Osaka,<sup>§</sup> and Takashi Kyotani<sup>†</sup>

<sup>†</sup>Institute of Multidisciplinary Research for Advanced Materials, Tohoku University, 2-1-1 Katahira, Aoba-ku, Sendai, 980-8577, Japan

<sup>‡</sup>Division of Chemical Process Engineering, Graduate School of Engineering, Hokkaido University, N12W8 Kita-ku, Sapporo 060-8628, Japan

<sup>§</sup>Faculty of Science and Engineering, Waseda University, 3-4-1, Okubo, Shinjuku-ku, Tokyo, 169-8555, Japan

\*E-mail: [nishihara@tagen.tohoku.ac.jp](mailto:nishihara@tagen.tohoku.ac.jp)

### S1. Energy density of a LIB cell versus capacity of a negative-electrode material

The relation between energy density of a LIB cell ( $W_{\text{cell}}$  [Wh kg<sup>-1</sup>]) and gravimetric capacity of negative electrode material ( $C_{\text{n}}$  [mAh g<sup>-1</sup>]) was calculated by the following method. A common cylindrical 18650 cell contains ca. 50 wt% of active materials. This is expressed as follows:

$$\frac{m_{\text{p}}+m_{\text{n}}}{m_{\text{cell}}} = 0.5 \quad (1)$$

where  $m_{\text{p}}$  [g],  $m_{\text{n}}$  [g], and  $m_{\text{cell}}$  [g] are the mass of positive electrode material, the mass of negative electrode materials, and the weight of a LIB cell, respectively. To maximize the capacity of a LIB cell ( $C_{\text{cell}}$  [mAh g<sup>-1</sup>]), the capacities of positive and negative electrodes should be the same. Therefore, the following relation should be established.

$$C_{\text{p}}m_{\text{p}} = C_{\text{n}}m_{\text{c}} \quad (2)$$

where  $C_{\text{p}}$  [mAh g<sup>-1</sup>] is a gravimetric capacity of positive electrode material. The capacity of a LIB cell ( $C_{\text{cell}}$ ) can be calculated by the following equation.

$$C_{\text{cell}} = \frac{C_{\text{p}}m_{\text{p}}}{m_{\text{cell}}} = \frac{C_{\text{n}}m_{\text{n}}}{m_{\text{cell}}} \quad (3)$$

By adopting (1) and (2) into (3), the following equation can be obtained.

$$C_{\text{cell}} = \frac{0.5C_{\text{p}}C_{\text{n}}}{C_{\text{a}}+C_{\text{c}}} \quad (4)$$

The unit of  $C_{\text{cell}}$  (mAh g<sup>-1</sup>) is equivalent to Ah kg<sup>-1</sup>. Therefore,  $W_{\text{cell}}$  can be expressed as a function of  $C_{\text{n}}$  as follows, when  $C_{\text{p}}$  and operating voltage ( $E$  [V]) are given.

$$W_{\text{cell}} = C_{\text{cell}}E = \frac{0.5C_{\text{p}}C_{\text{n}}E}{C_{\text{a}}+C_{\text{c}}} \quad (5)$$

## S2. Spontaneous potential of Li-Si alloy before and after ball-milling

Each of Li-Si powders before and after ball-milling was packed with a nickel-mesh bag, which is a current collector. The bag thus prepared was immersed into the electrolyte solution (1 M LiPF<sub>6</sub> in a mixture of ethylene carbonate and diethyl carbonate (1:1 by volume)) together with a reference electrode (Li foil). After a stabilization period (60 min), a potential of the Li-Si alloy against Li foil was measured with a voltmeter. The potentials of Li-Si alloy before and after ball-milling were 0.05 and 0.28 V (vs. Li/Li<sup>+</sup>), respectively. This result indicates that some amount of lithium was released from the Li-Si alloy during the ball-milling process, due to oxidation or unexpected degradation.

## S3. Differential capacity plots of Li<sub>21</sub>Si<sub>5</sub>(0.2–2 μm)

Figure S1 shows differential capacity plots of Li<sub>21</sub>Si<sub>5</sub>(0.2–2 μm). In the pre-delithiation step, this sample shows a sharp peak at 0.45 V, corresponding to delithiation reaction. Then, in the 1st~3rd cycles, two peaks appear around 0.25 and 0.1 V during lithiation process, and delithiation peaks are located around 0.3 and 0.5 V. Such lithiation/delithiation behavior after the pre-delithiation is almost the same as that of amorphous Si.<sup>[1]</sup>

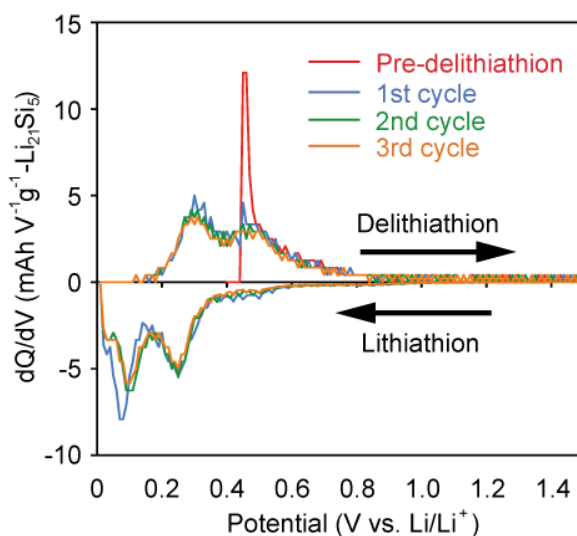

**Figure S1.** Differential capacity plots of Li<sub>21</sub>Si<sub>5</sub>(0.2– 2 μm), corresponding to the charge/discharge curves shown in Figure 4a.

**S4. SEM images of carbon blacks and  $\text{Li}_{21}\text{Si}_5$ (0.2–2  $\mu\text{m}$ ) coated with the carbon blacks**

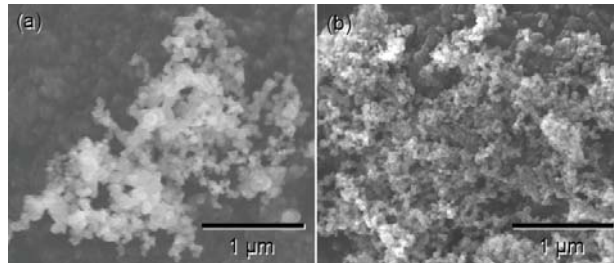

**Figure S2.** SEM images of (a) acetylene black and (b) ketjen black.

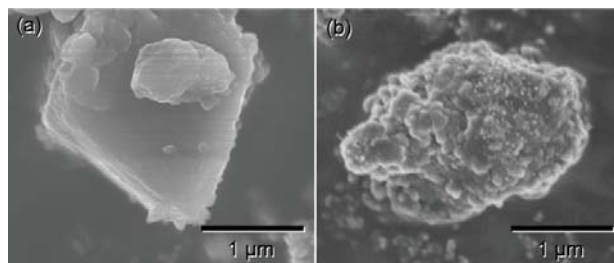

**Figure S3.** SEM images of  $\text{Li}_{21}\text{Si}_5$ (0.2–2  $\mu\text{m}$ ) particles (a) before and (b) after coating with CBs.

Reference

- [1] S. Iwamura, H. Nishihara, T. Kyotani, J. Power Sources 2013, 222, 400.
